# Supplementary material
Source: PubMed Central journal article supplement (PMC5275966)

**Figure S3. Autocorrelation Analysis of Myelinated Fibers, Related to Figure 5.**

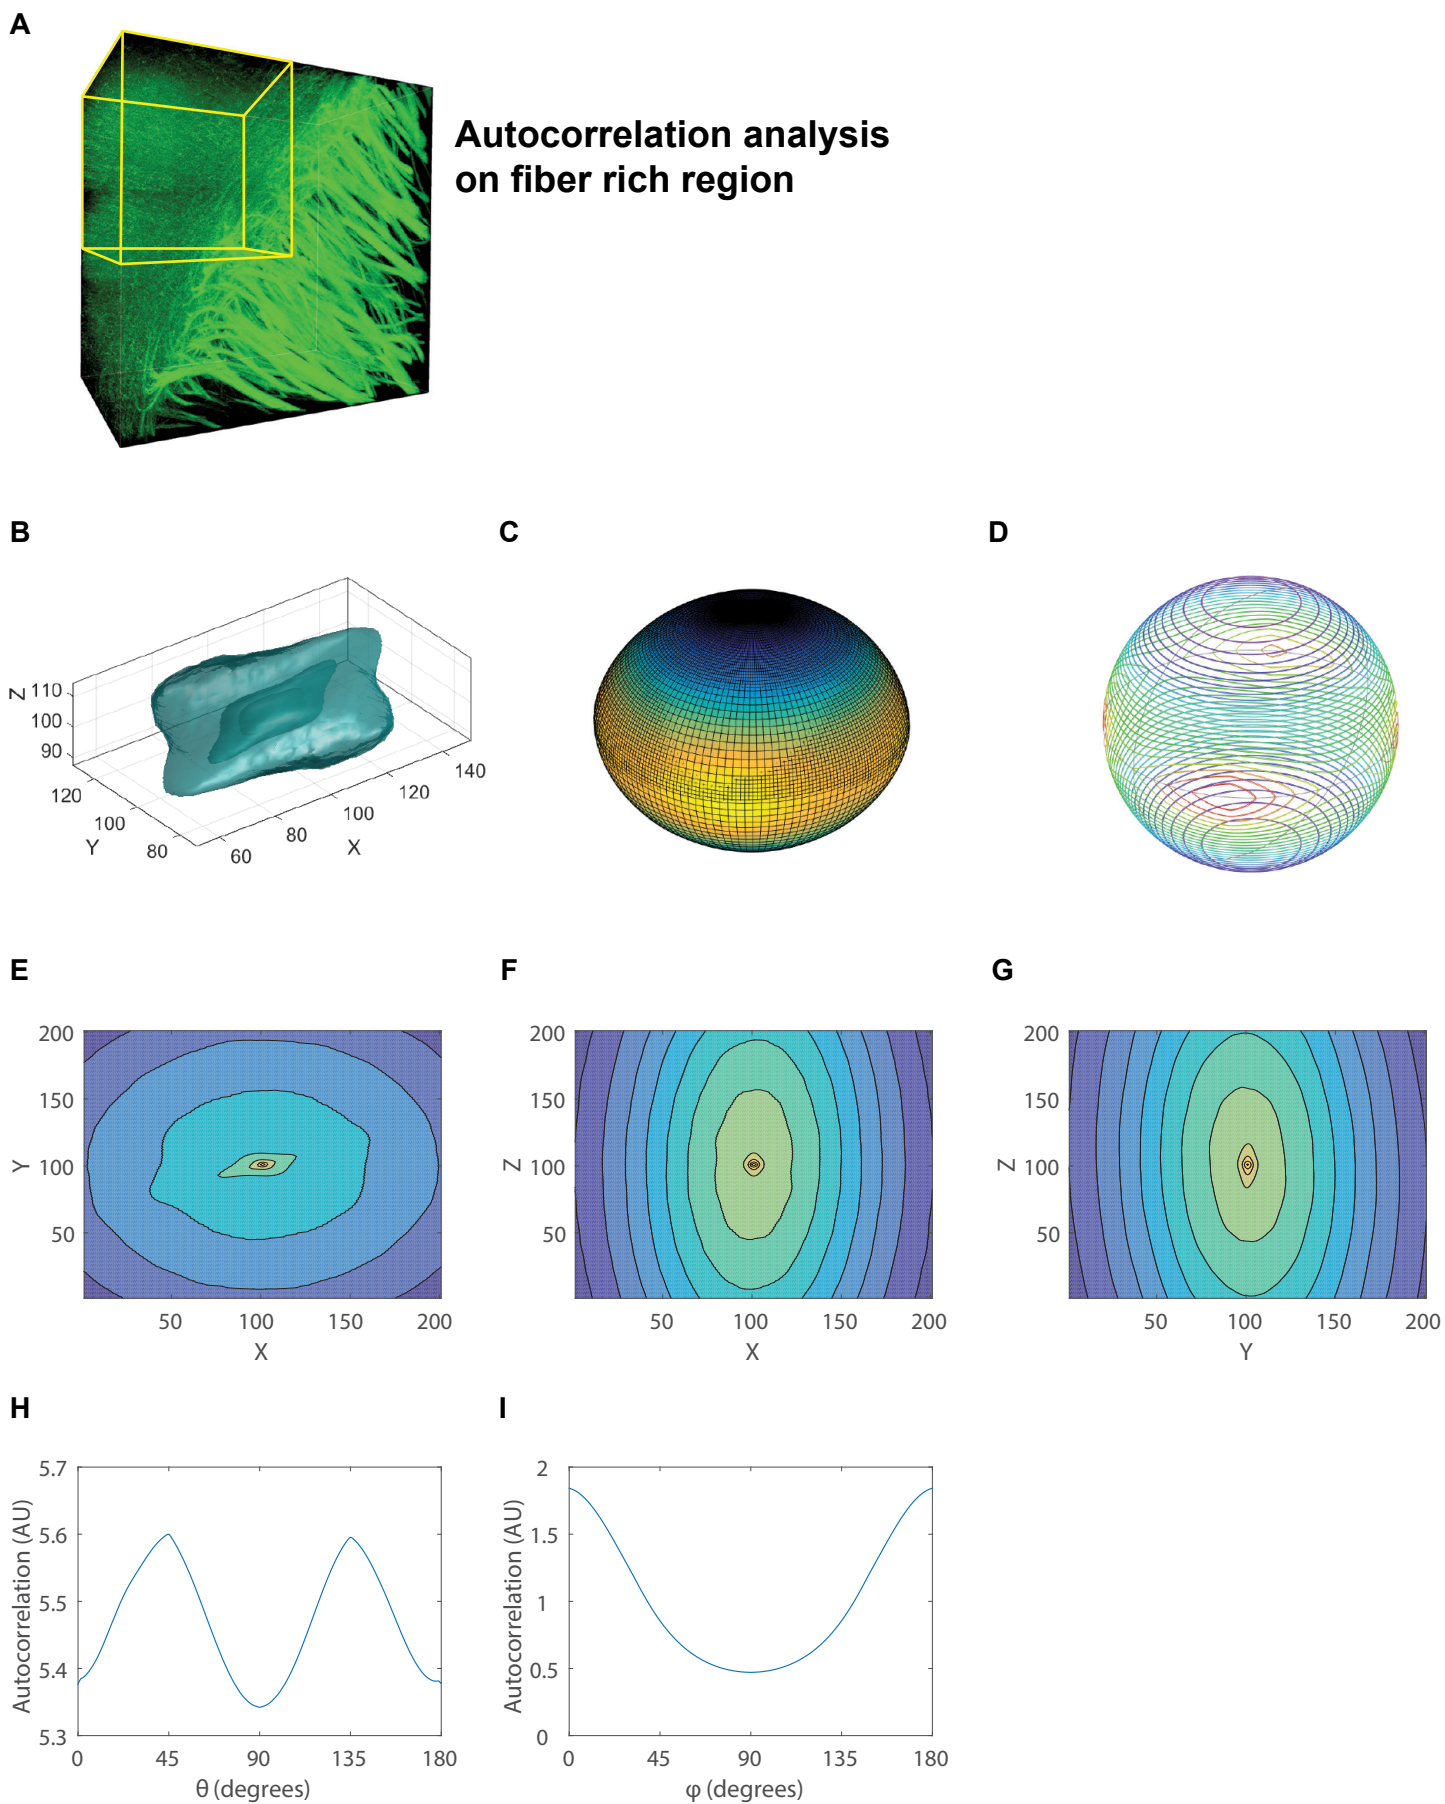

**J**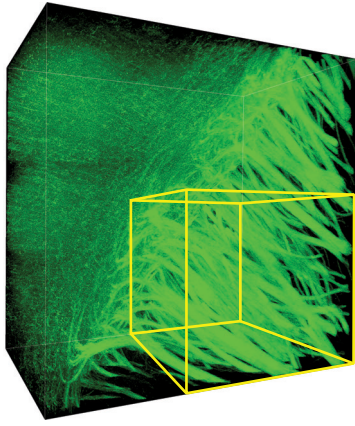

**Autocorrelation analysis  
on fascicle rich region**

**K**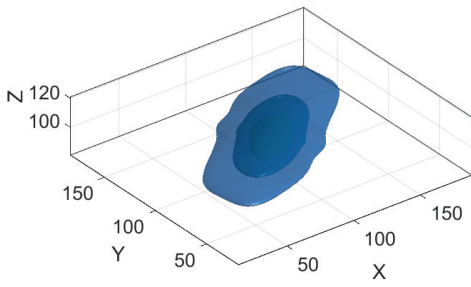**L**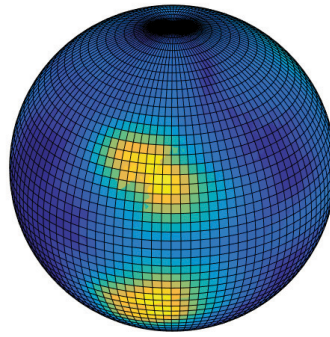**M**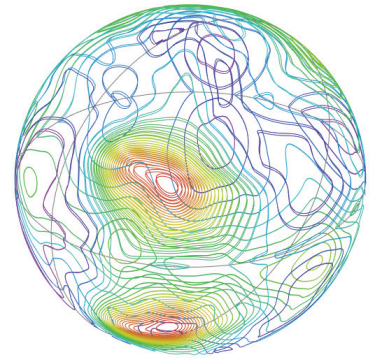**N**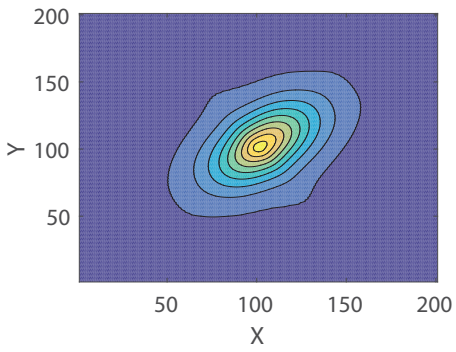**O**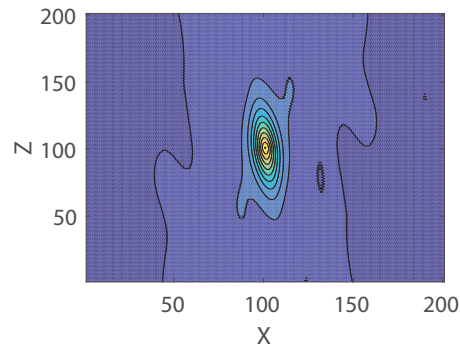**P**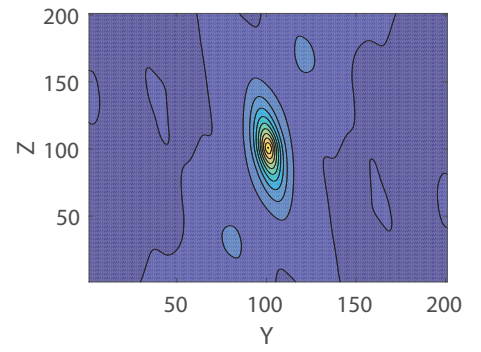**Q**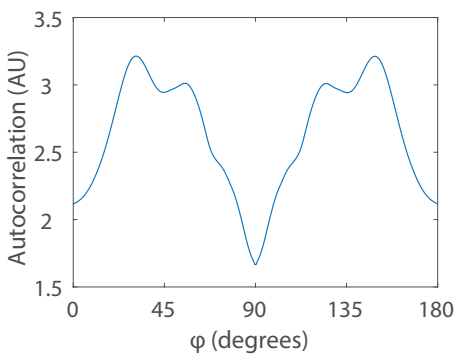**R**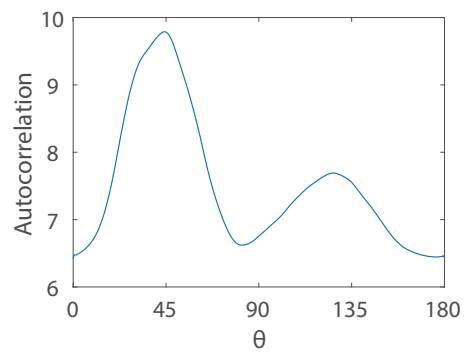

Supplement: NIHMS842107-supplement-Fig_S3.pdf [file NIHMS842107-supplement-Fig_S3.pdf]
